# Supplementary material
Source: ML conference proceedings conference paper supplement (https://openreview.net/forum?id=RzV7QRowUl)
Supplement: supplementary_material [file attachment]

**TL;DR: “One layer” is all you need! An implicit-depth (or infinite-depth) model that solves for equilibriums and achieves SOTA, with only constant memory.**

## Introduction

- Deep networks have long been built on a core concept: *layers*. Network depth are usually hand-picked by model designers: e.g., ResNet-18/101.
- We propose the **Deep Equilibrium (DEQ) Models** that reduce many classes of deep models with a **single layer** (defined implicitly) without loss of representational capacity:

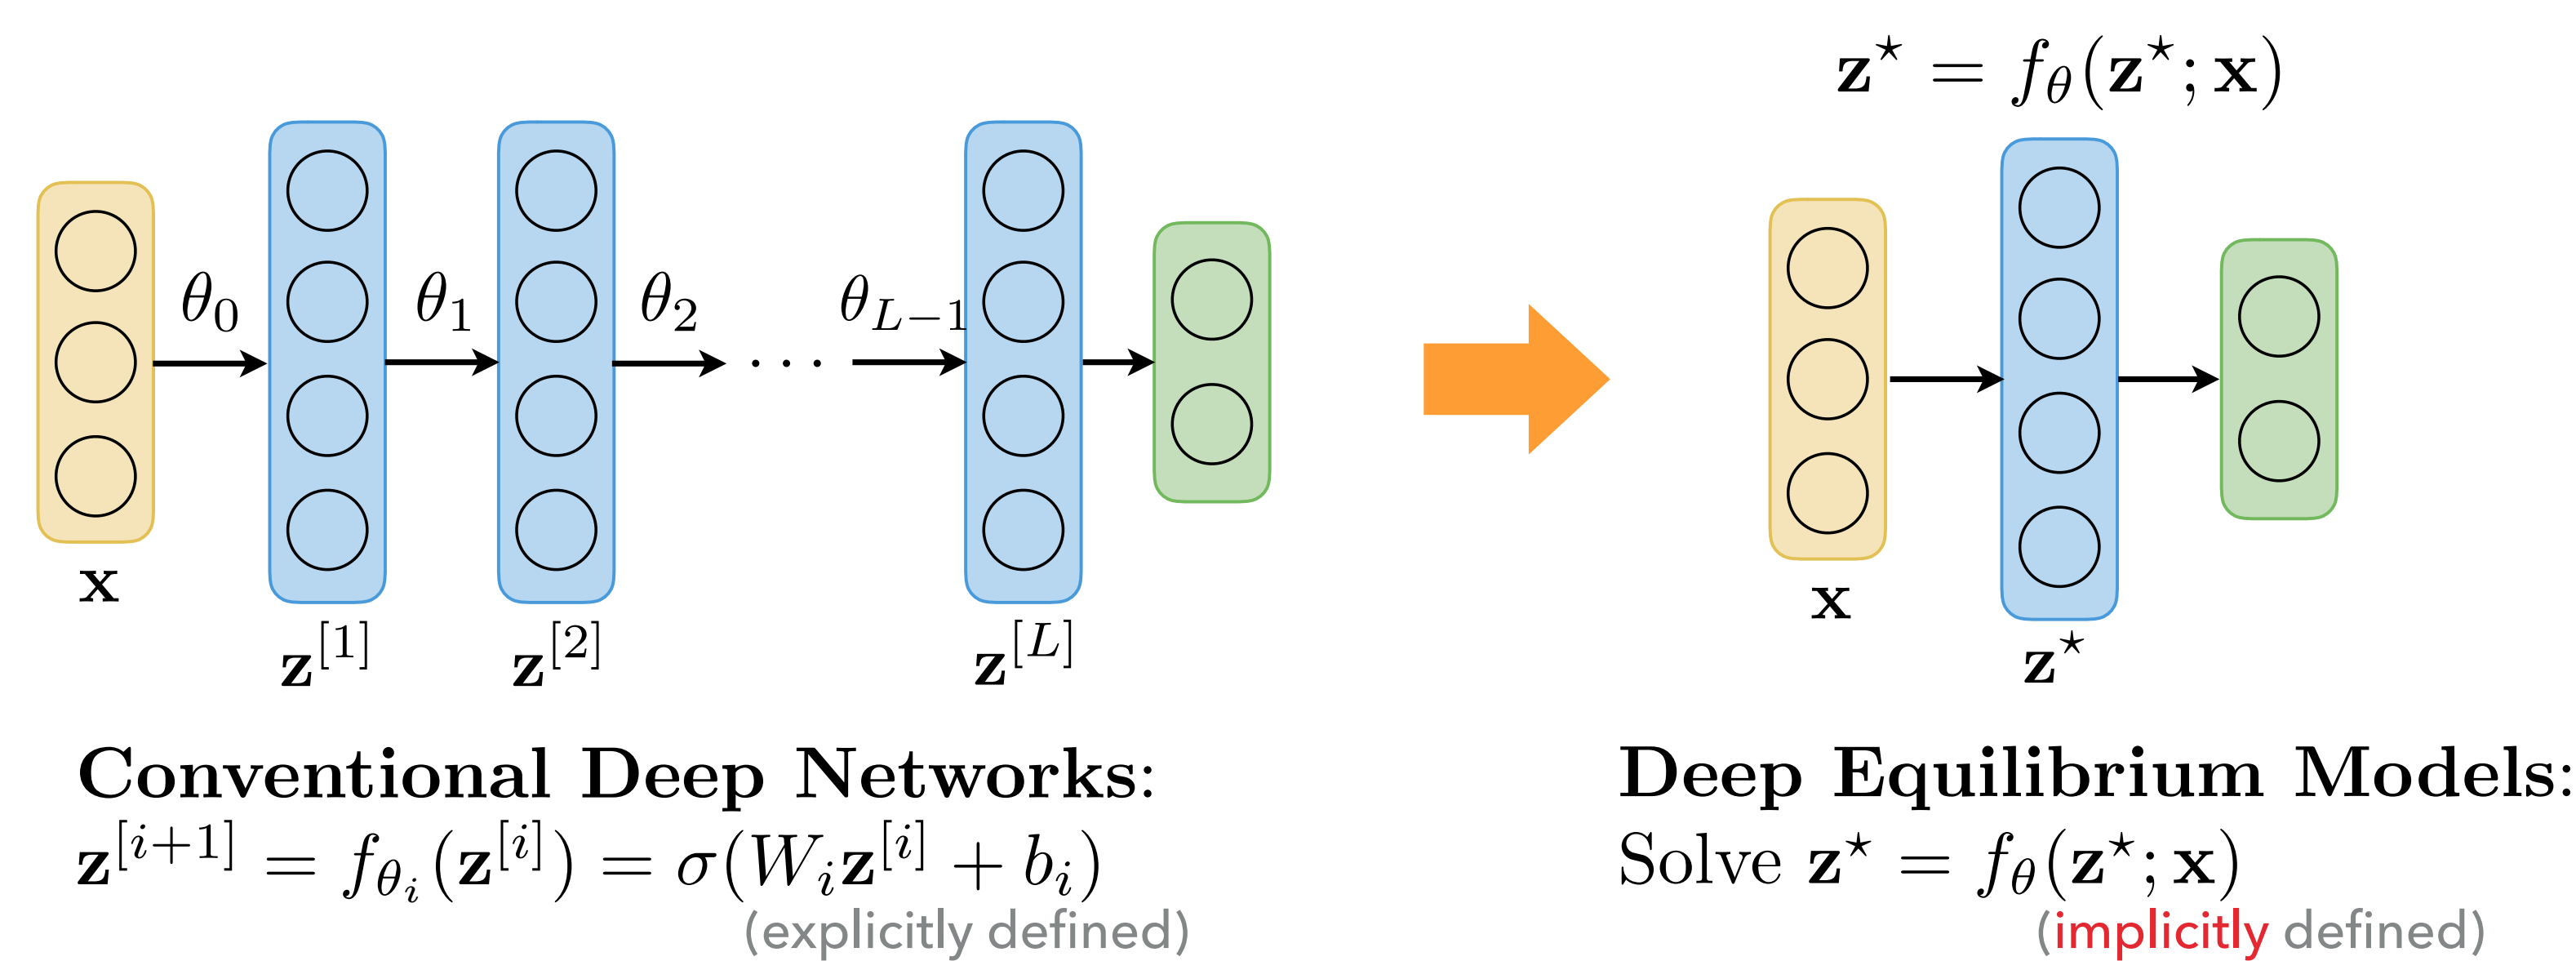

- DEQ aims to directly compute the hidden features of a weight-tied network at its “infinite limit”, but with **memory cost of just one layer (i.e., constant)**.
- Empirically, we show DEQ instantiated on sequence models reduces SOTA deep networks by almost **90%** of its GPU memory cost, while achieving better results.
- Output(s) of the network are defined **implicitly**.

| Explicit Layers                            | Implicit Layers                                                                   |
|--------------------------------------------|-----------------------------------------------------------------------------------|
| $\mathbf{z}^{[i+1]} = f(\mathbf{z}^{[i]})$ | find $\mathbf{z}^{[i+1]}$ such that $f(\mathbf{z}^{[i]}, \mathbf{z}^{[i+1]}) = 0$ |

**Q: Is weight-tying a big restriction?**

**A: Not at all** (as we will show later). Empirical evidence: TrellisNet, Universal Transformer, ALBERT, ...

- Code at: <https://github.com/locuslab/deq>

## Related Work

- Prior works have used gradient-checkpointing [4] and reversible networks [6] to reduce memory cost.
- Neural-ODE [3]; more work on implicit deep learning can also trace back to some original works on the **attractor networks** and **recurrent backpropagation (RBP)** [1].

## Deep Equilibrium Models

- To do the reduction from deep networks to a single-layer model, we broadly consider the class of weight-tied, input-injected deep models:

$$\mathbf{z}^{[i+1]} = f_{\theta}(\mathbf{z}^{[i]}; \mathbf{x}), \quad i = 0, \dots, L-1, \quad \mathbf{z}^{[0]} = \mathbf{0}$$

where  $f_{\theta}$  could be complex. Illustration in Figure 1 (left).

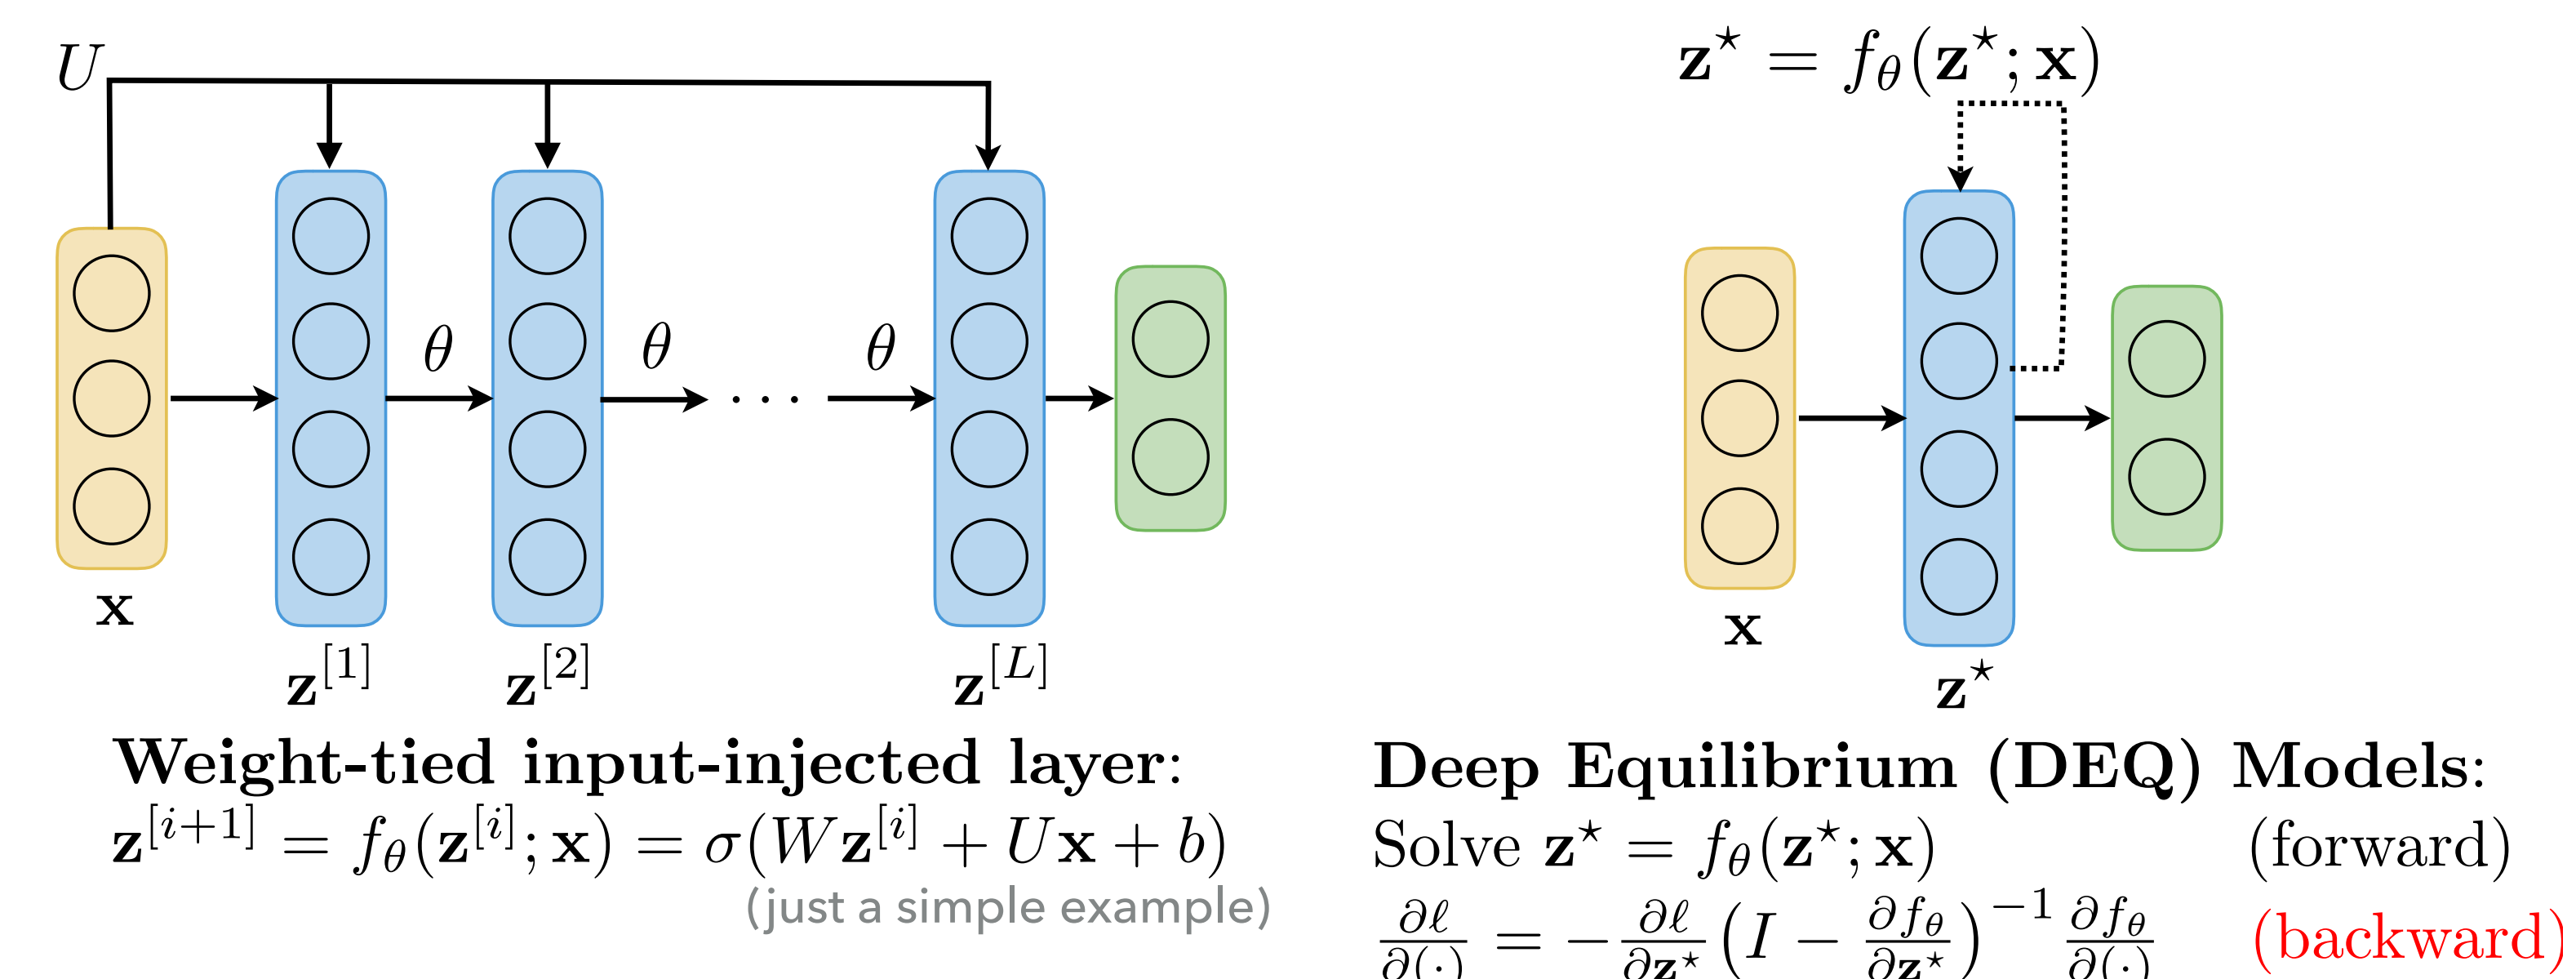

Figure 1: A weight-tied, input-injected network and a deep equilibrium “network”.

- In practice, after these types of models converge to an equilibrium point:

$$f_{\theta}(\mathbf{z}^*; \mathbf{x}) = \mathbf{z}^*$$

**Q: When will the equilibrium points exist?**

**A:** They virtually always exist. Intuitively, the layers we use for **deep** networks already need this amount of stability.

**Deep Equilibrium (DEQ) Models:** directly solve for this equilibrium/stable point via black-box **root-finding**; directly differentiate *through* the equilibrium state.

**To train/predict with a DEQ:**

- Define a single layer  $f_{\theta}$ , and  $g_{\theta}(\mathbf{z}; \mathbf{x}) := f_{\theta}(\mathbf{z}; \mathbf{x}) - \mathbf{z}$ .

**Forward pass:** Given input  $\mathbf{x}_{1:T}$ , compute the **equilibrium point**  $\mathbf{z}^*$ , which is the root of  $g_{\theta}$ :

$$\mathbf{z}^* = (\text{black-box})\text{RootFind}(g_{\theta}; \mathbf{x})$$

**Backward pass:** Implicitly differentiate through this equilibrium state only using the output:

$$\frac{\partial \ell}{\partial (\cdot)} = -\frac{\partial \ell}{\partial \mathbf{z}^*} (J_{g_{\theta}}^{-1} |_{\mathbf{z}^*}) \frac{\partial f_{\theta}(\mathbf{z}^*; \mathbf{x})}{\partial (\cdot)}$$

regardless of the path/trajectory to this equilibrium.

## Accelerating DEQ and Properties of DEQ Models

- No need to actually compute the inverse Jacobian  $J_{g_{\theta}}^{-1}$ .
- In the **forward** pass, we propose to use Broyden’s method (quasi-Newton) that makes low-rank updates to estimate  $J_{g_{\theta}}^{-1}$ :

$$J_{g_{\theta}}^{-1} |_{\mathbf{z}^{[i+1]}} \approx B_{g_{\theta}}^{[i+1]} = B_{g_{\theta}}^{[i]} + \mathbf{u}^{[i]} \mathbf{v}^{[i] \top}$$

- In the **backward** pass, we alternatively solve the linear system

$$(J_{g_{\theta}}^{\top} |_{\mathbf{z}^*}) \mathbf{x}^{\top} + \left( \frac{\partial \ell}{\partial \mathbf{z}^*} \right)^{\top} = \mathbf{0}$$

where the vector-Jacobian product can be efficiently computed (time-wise and space-wise).

- Memory cost of DEQ:** **Forward pass** only needs to store  $\mathbf{z}^*$  and  $\mathbf{x}$  for the backward updates.

- Universality of DEQ model’s capacity:**

**Theorem 1**[informal]: Any conventional deep network can be recovered by a DEQ.

**Theorem 2**[informal]: Stacking multiple DEQs doesn’t create extra representational power than a single DEQ. (Proof in paper.)

**Key idea:** One layer (of DEQ) is all you need.

## Instantiations of DEQ on Sequences

- We specifically investigate the domain of **sequence modeling**, where  $\mathbf{z} = \mathbf{z}_{1:T}$  and  $\mathbf{x} = \mathbf{x}_{1:T}$  now have  $T$  timesteps, with  $f_{\theta}$  autoregressive.
- The formulation of DEQ is not predicated on any particular kind of  $f_{\theta}$ . We highlight its two (very different) instantiations using state-of-the-art sequence models (Figure 2).

- DEQ-**TrellisNet** [2]: (i.e.,  $f_{\theta}$  is **temporal convolutions**).

- DEQ-**Transformer** [5] (i.e.,  $f_{\theta}$  is **multihead self-attention**).

(More options possible...)

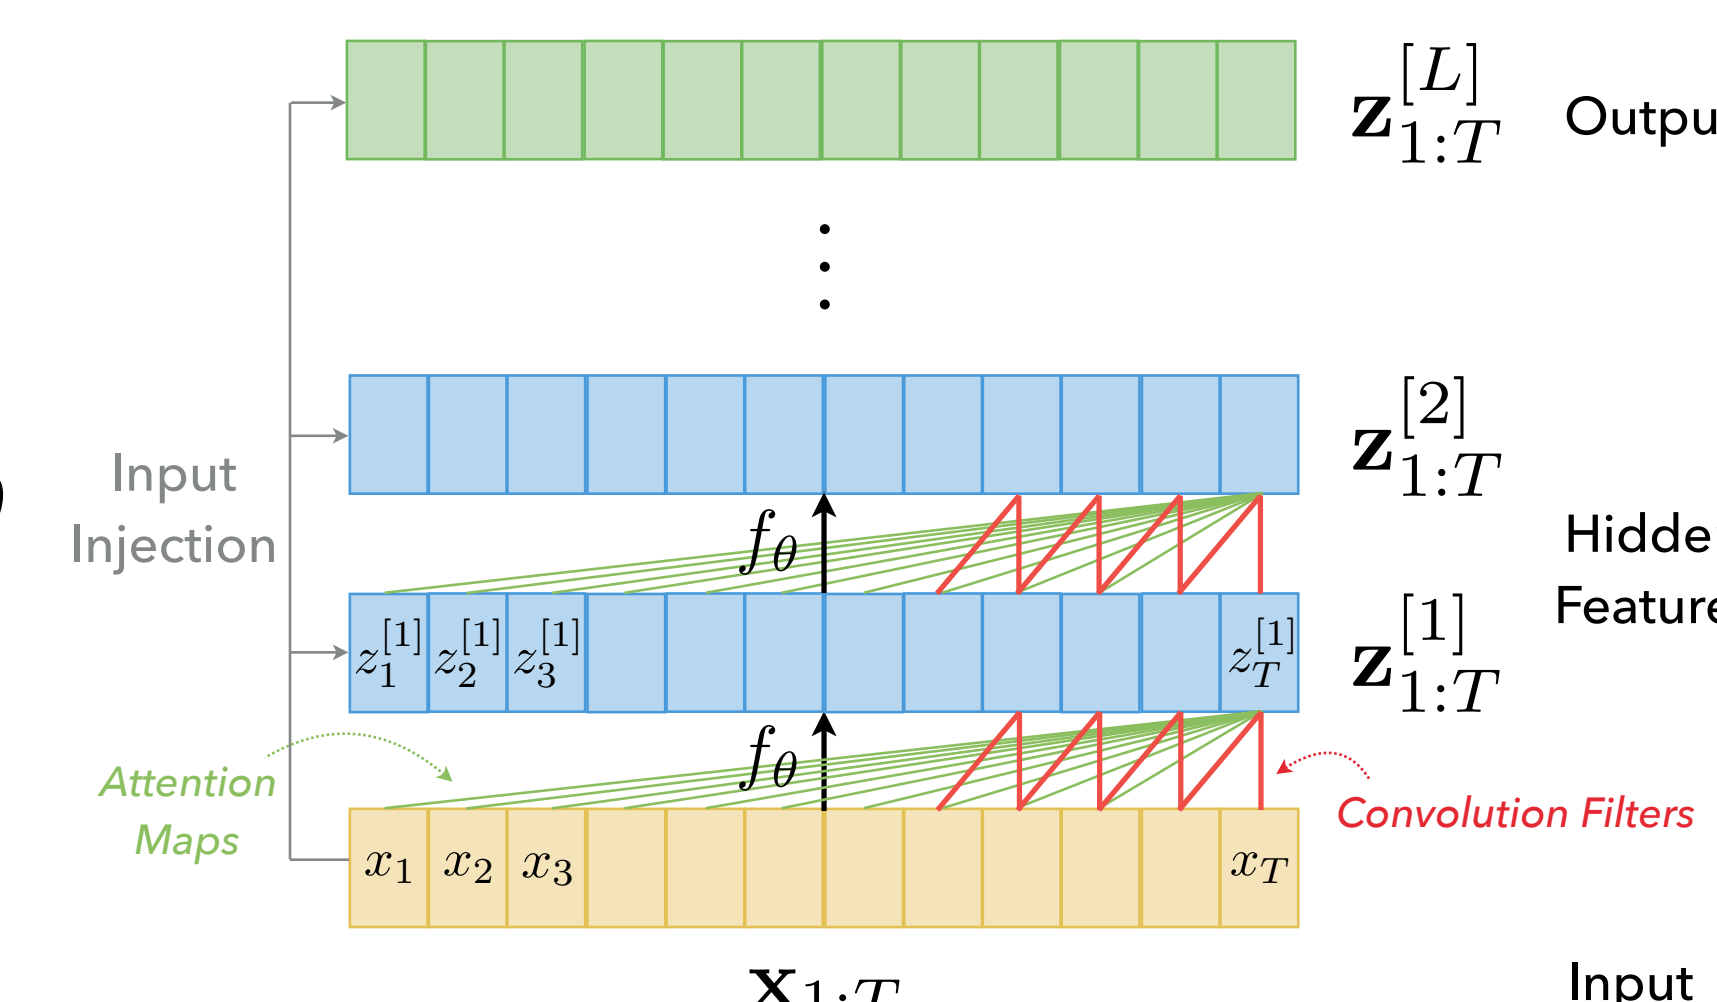

Figure 2: Two SOTA sequence models

## Experiments

- We test both instantiations of DEQ on both **synthetic** and **realistic, large-scale and high-dimensional** sequence benchmarks.

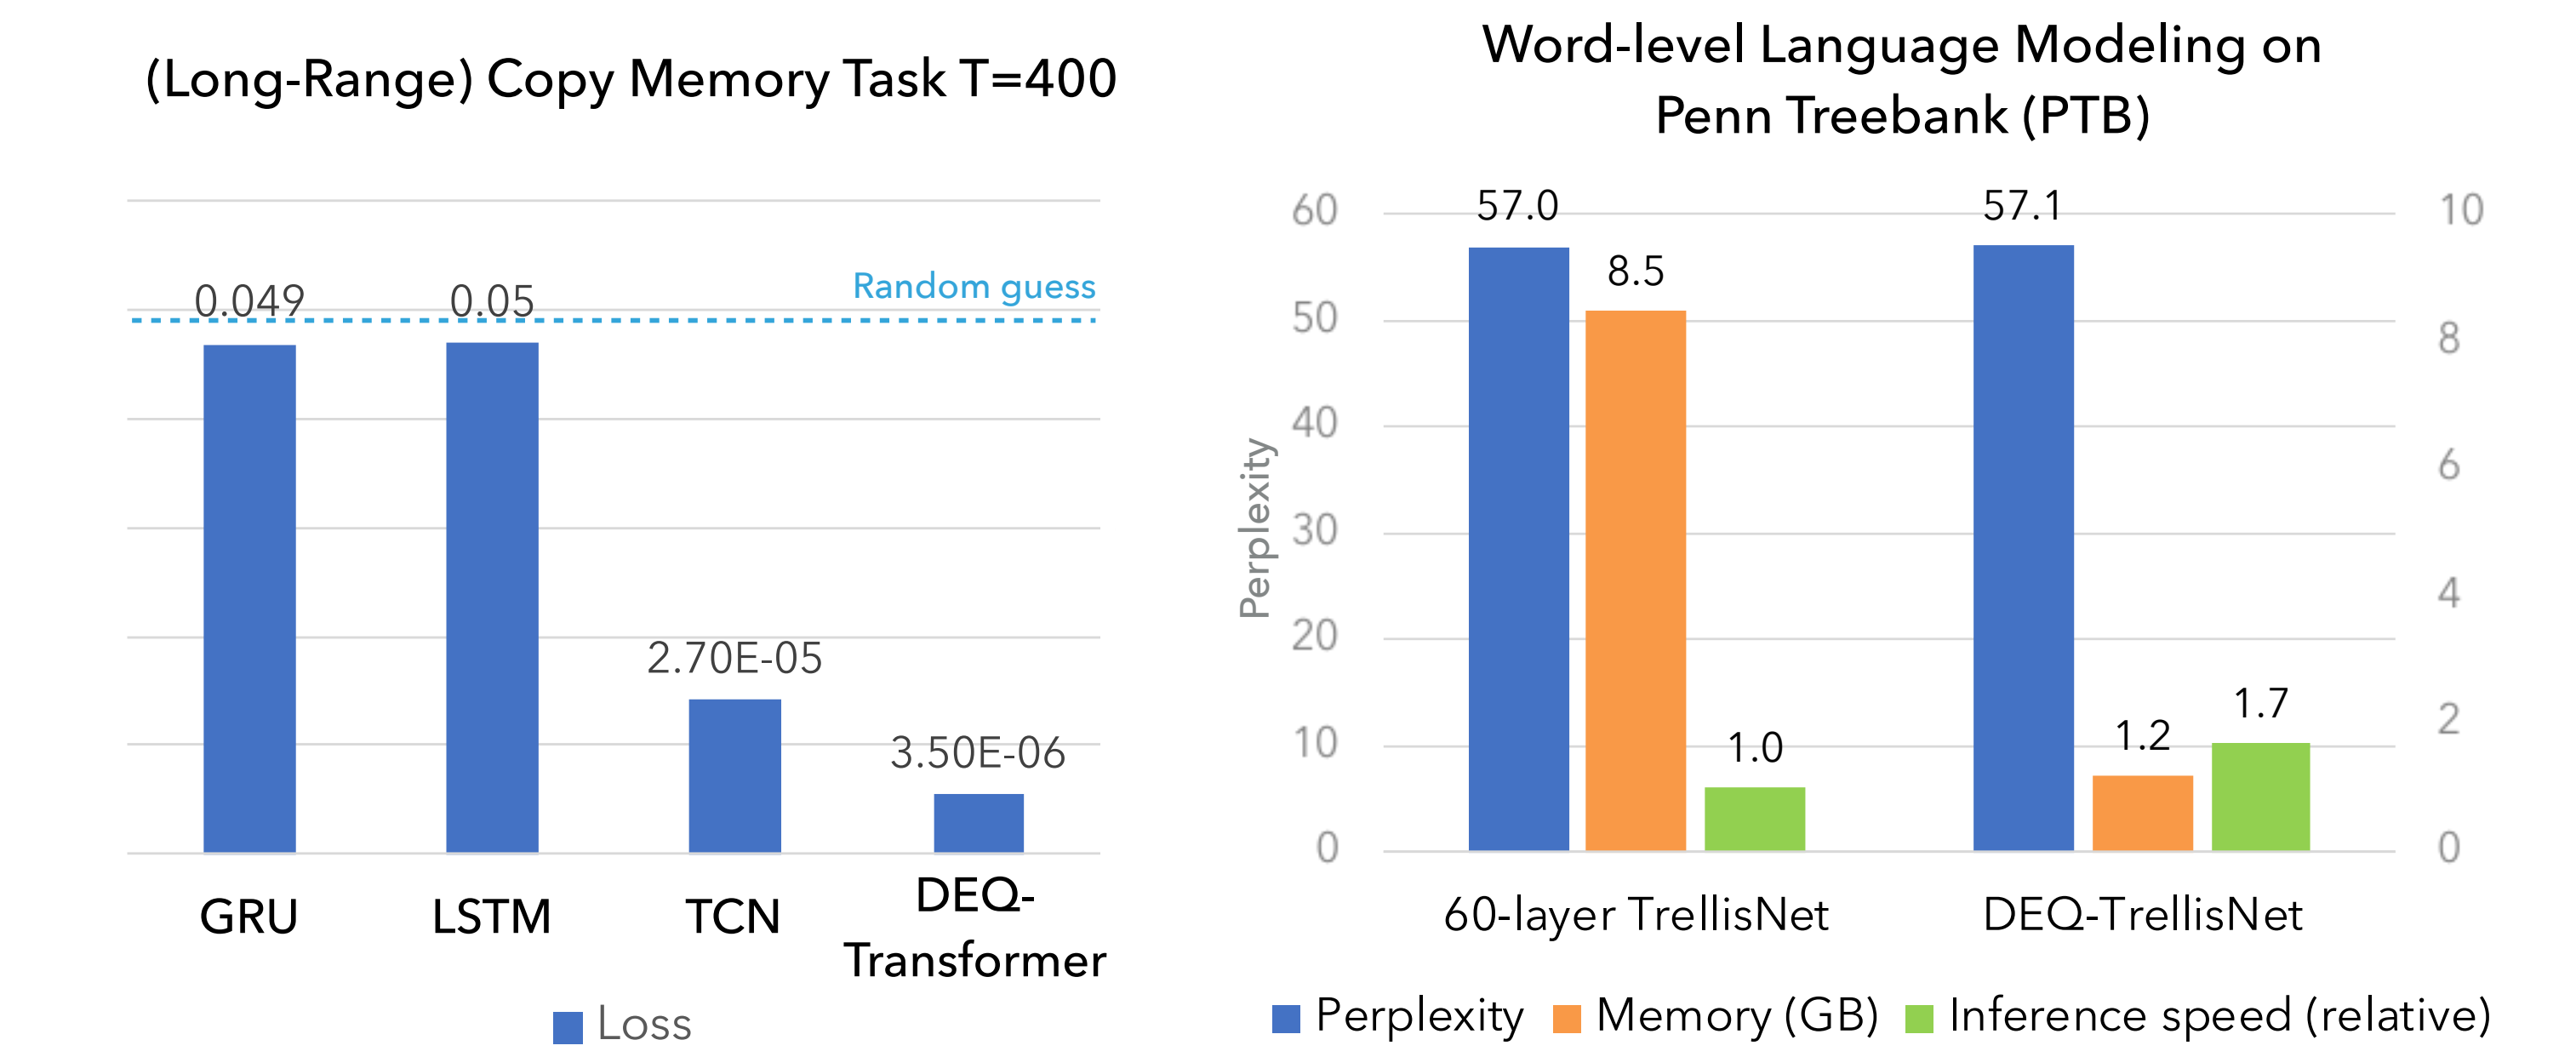

Figure 3: Left: DEQ demonstrates good memory retention over relatively long sequences. Right: DEQ achieves competitive performance on PTB corpus with > 80% reduction in memory cost.

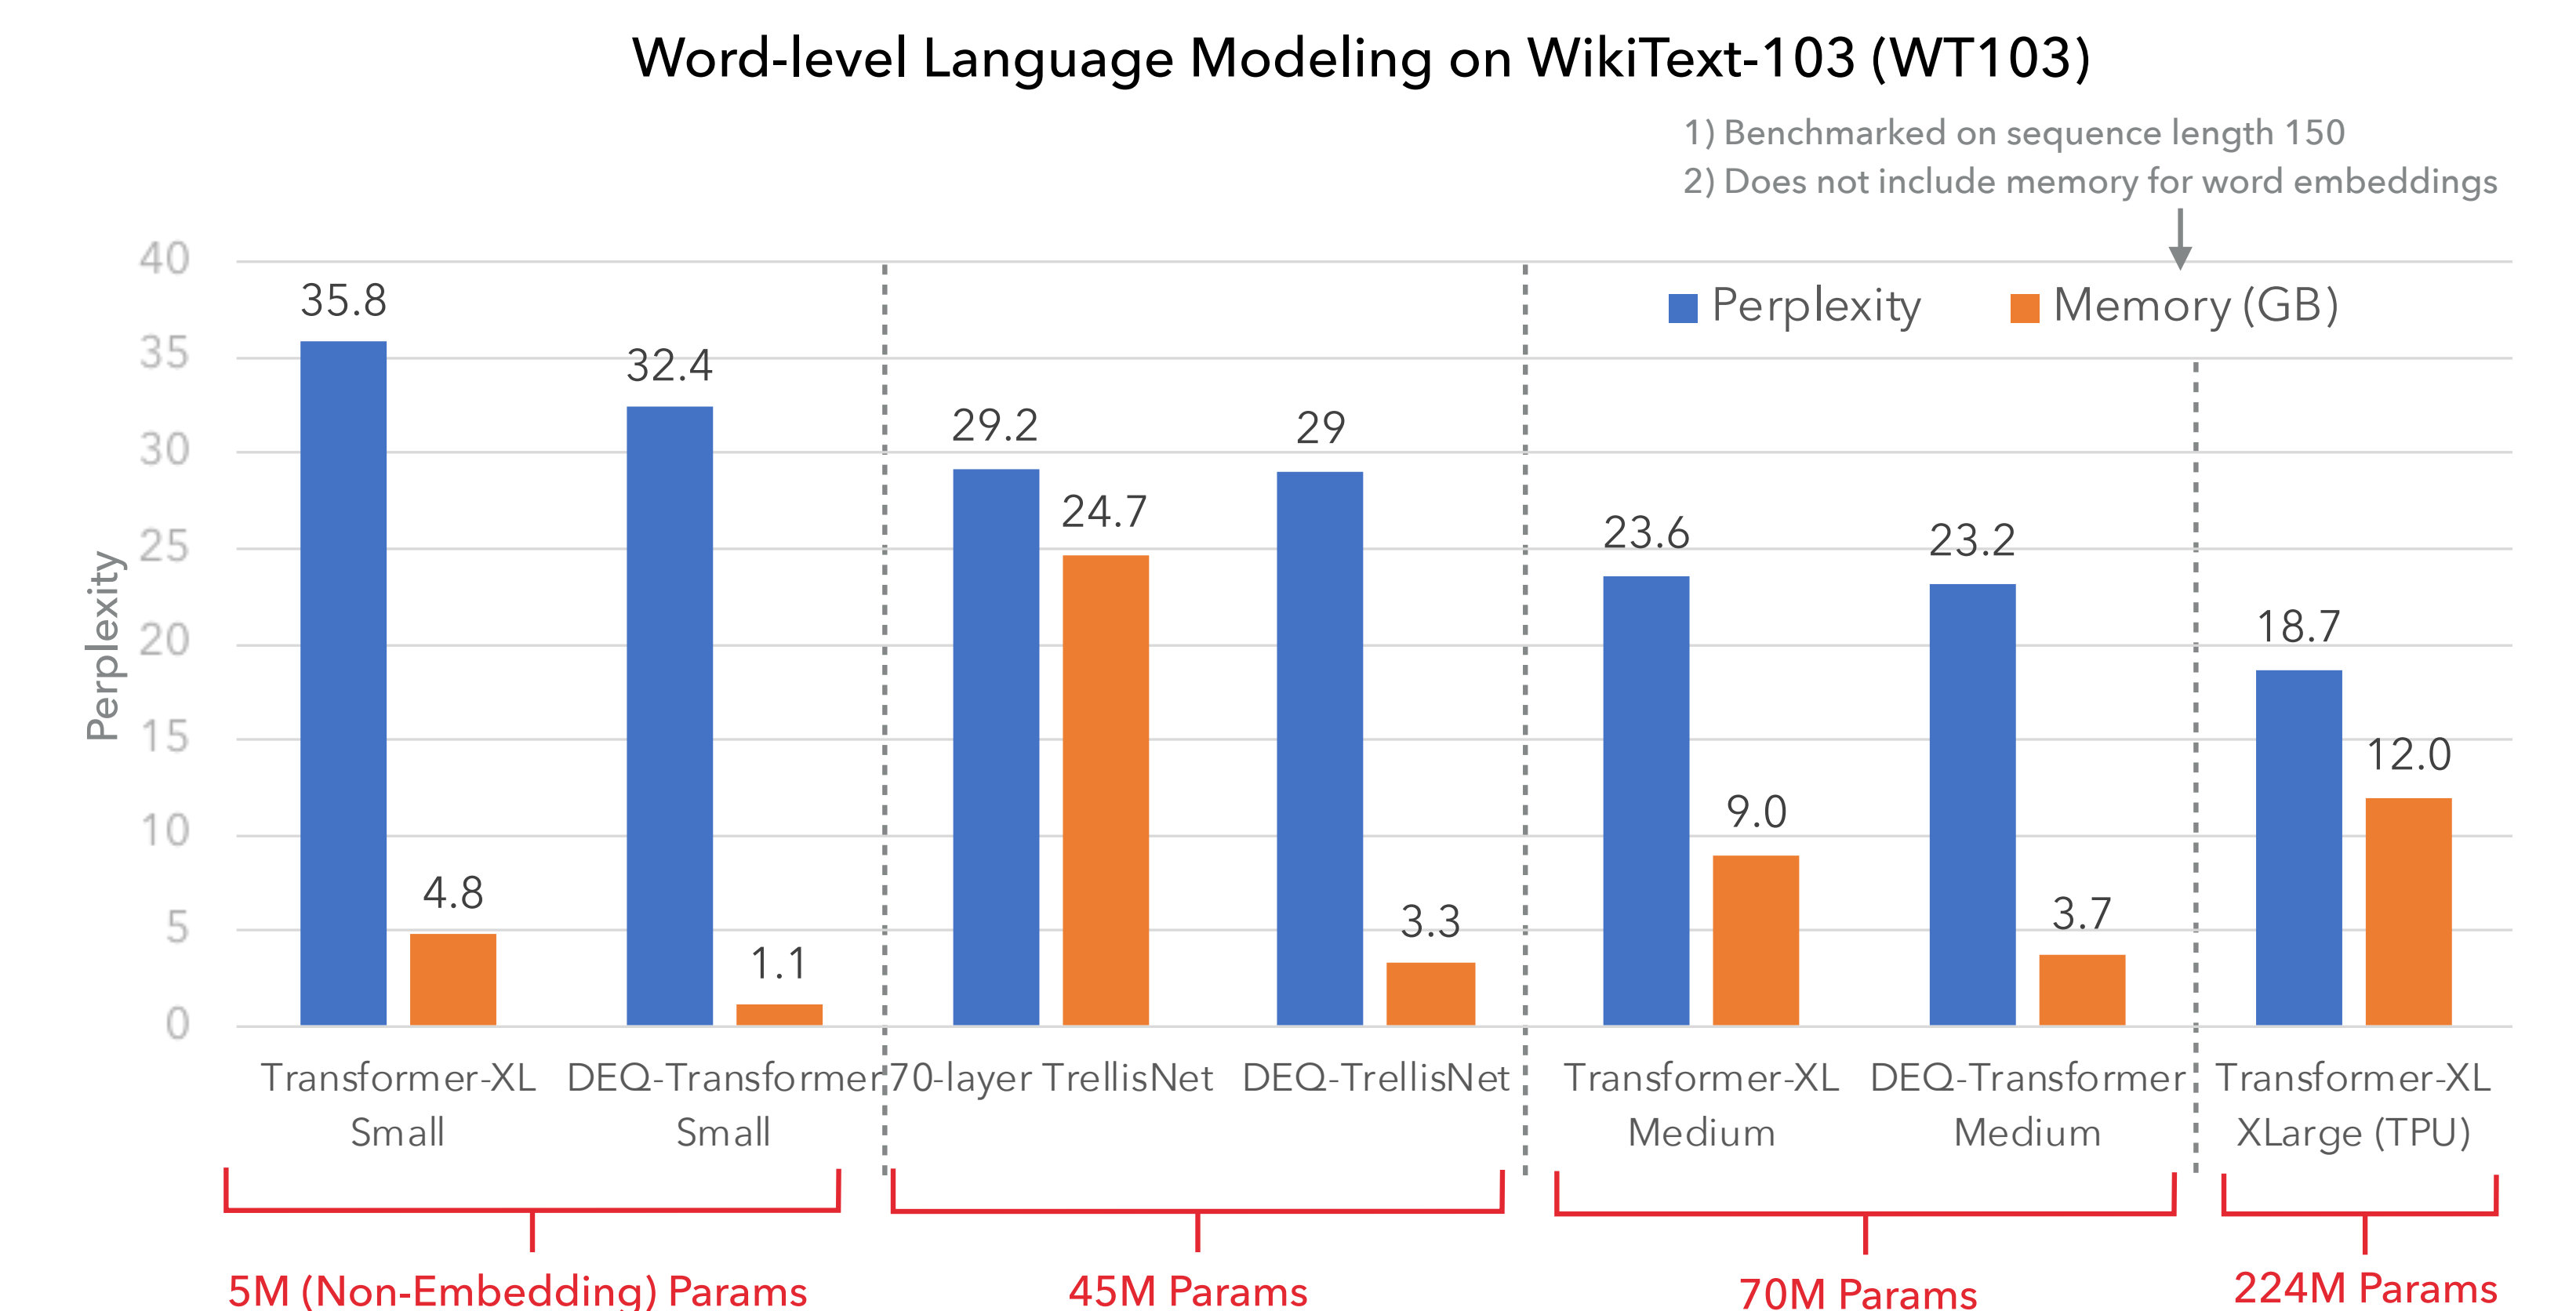

Figure 4: DEQ significantly reduces memory while improving the results on the large-scale WikiText-103 dataset.

- DEQ sequence models achieve results **on par with (or better than) the SOTA**, while paying **10-30%** of the memory cost.
- DEQ runtime: about **1.5-2x** slower at prediction.

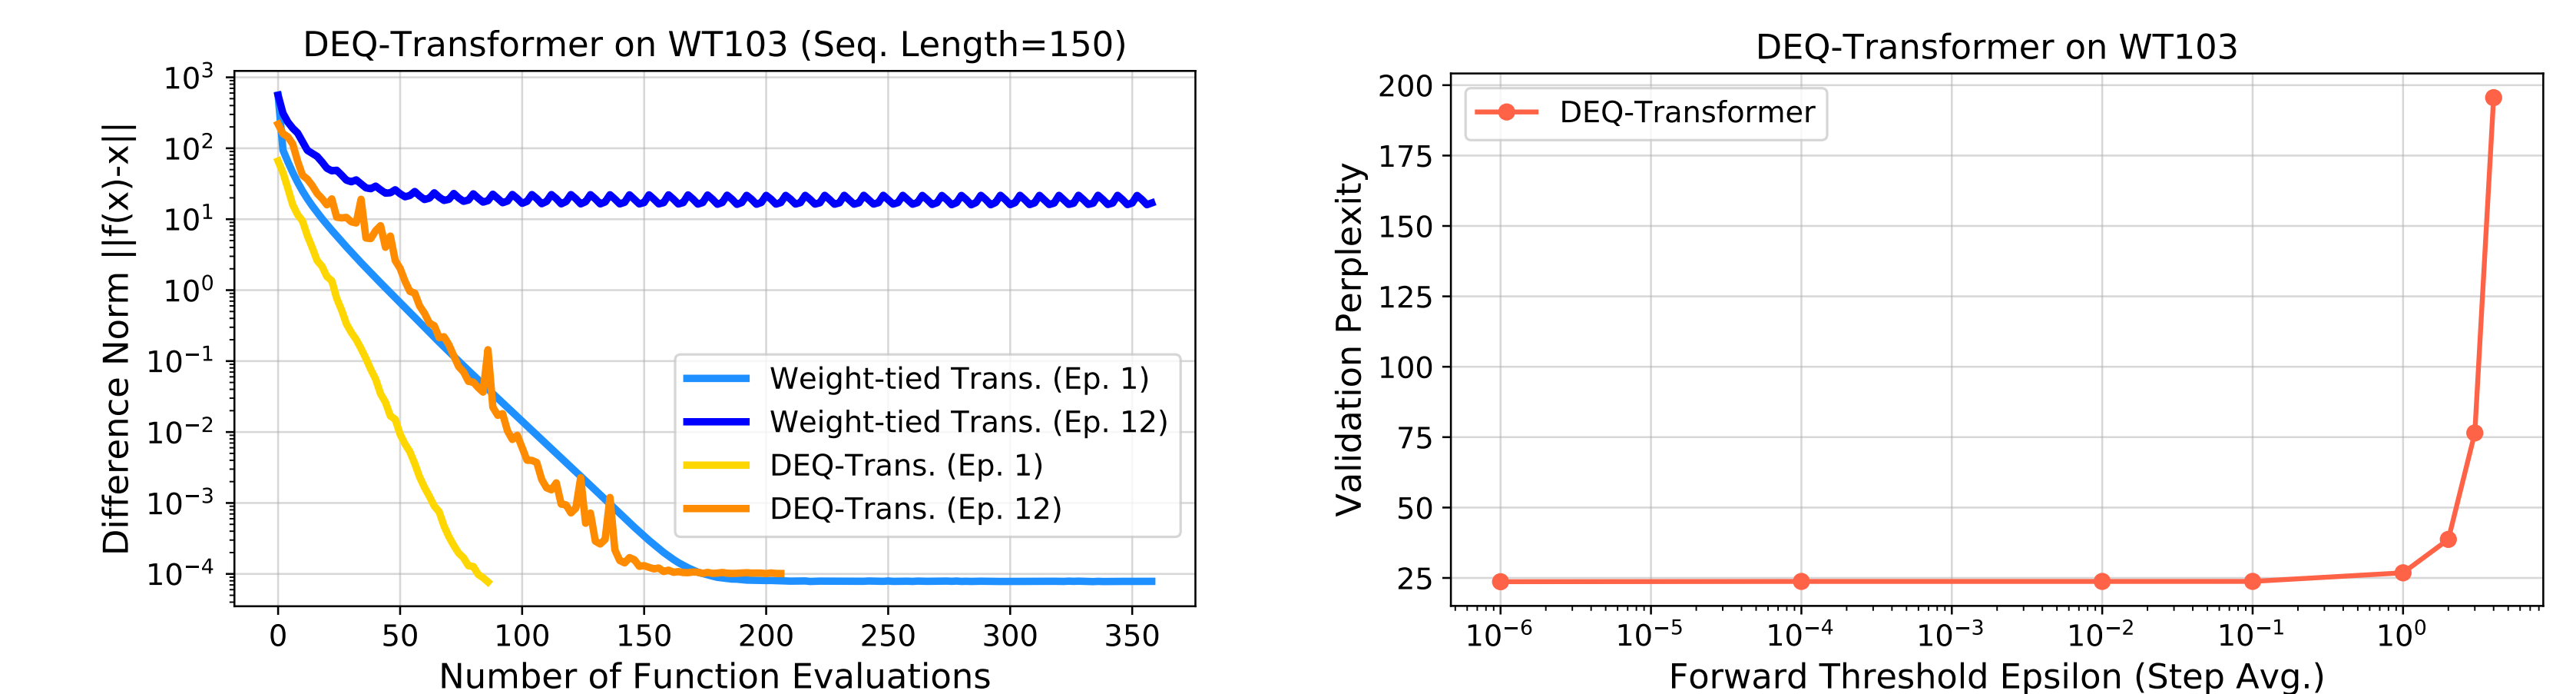

Figure 5: Left: DEQ-Transformer finds the equilibrium in a stable and efficient manner. Right: DEQ can be accelerated by leveraging higher tolerance  $\epsilon$ .

- DEQ represent the largest-scale practical application of implicit layers in deep learning of which we are aware.
