# Supplementary material
Source: ML conference proceedings conference paper supplement (https://openreview.net/forum?id=RzV7QRowUl)
Supplement: supplementary_material [file attachment]

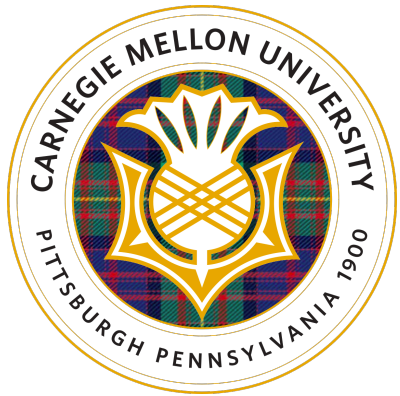

"DEQ"

# Deep Equilibrium Models

---

**Shaojie Bai**

Carnegie Mellon University

joint work with **J. Zico Kolter** (CMU/Bosch) and **Vladlen Koltun** (Intel)

NeurIPS 2019

**TL;DR: One (implicit) layer is all you need.**

# Outline of This Talk

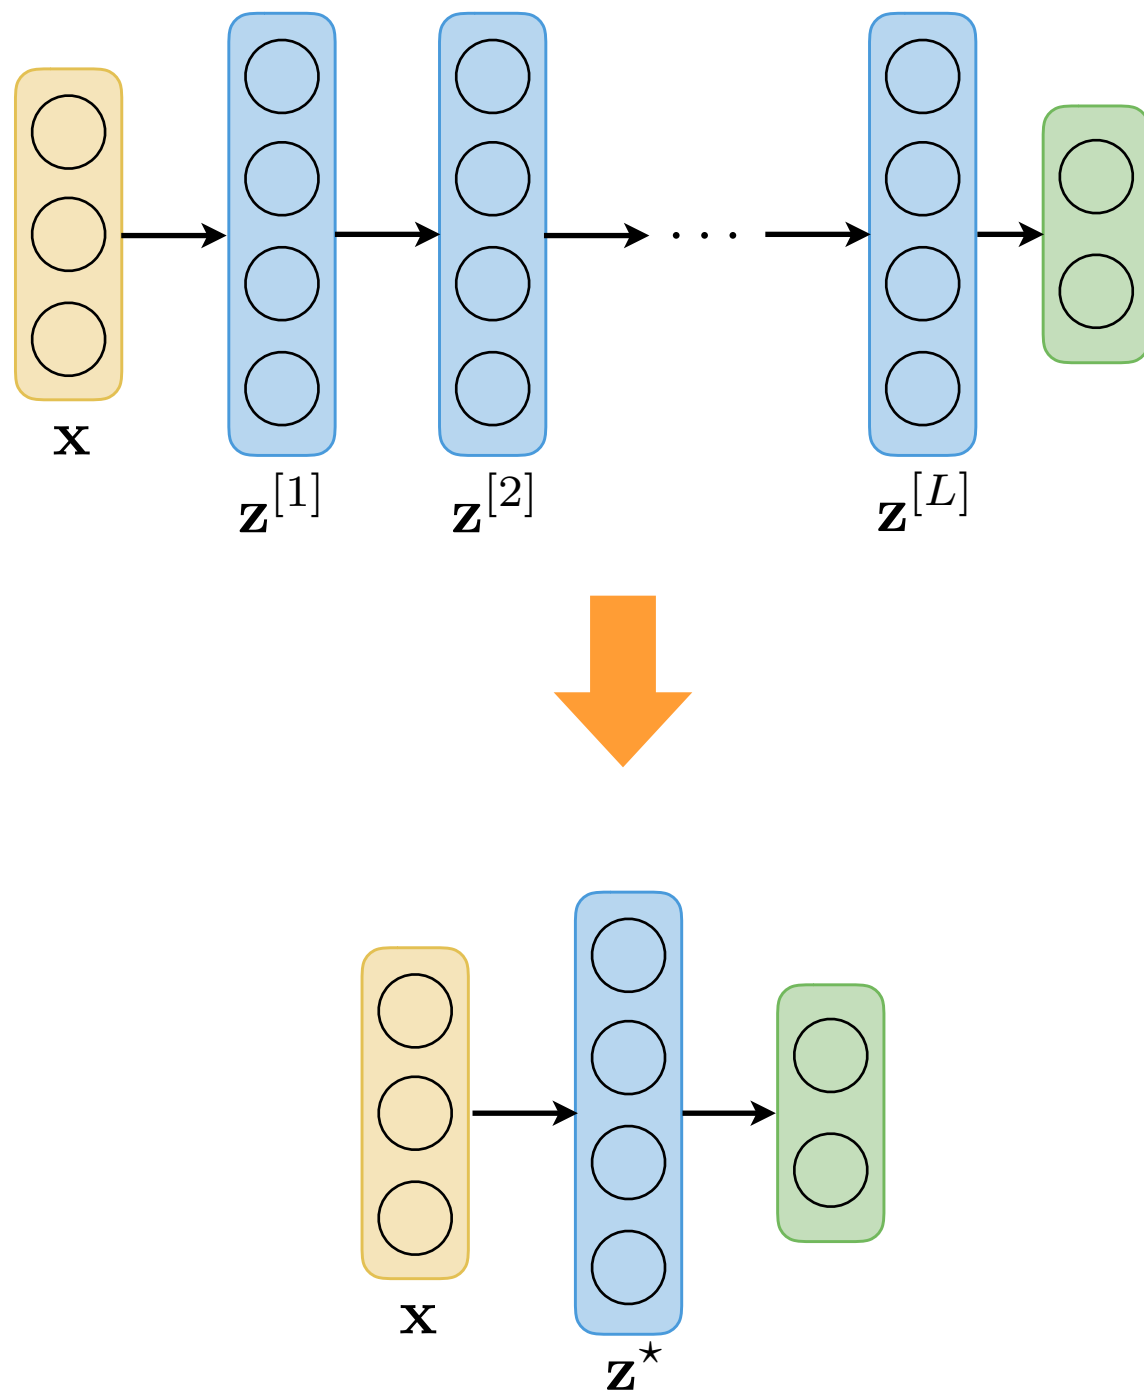

We can replace *many classes of* deep models with a single layer, keep the number of parameters the same, and lose no **representational capacity**.

Requires us to (re-)consider deep networks implicitly, with an approach that we call the **deep equilibrium (DEQ) model**.

Works as well (or better) than existing models on large-scale sequence tasks while using only constant memory.

# Weight-Tied, Input-Injected Networks

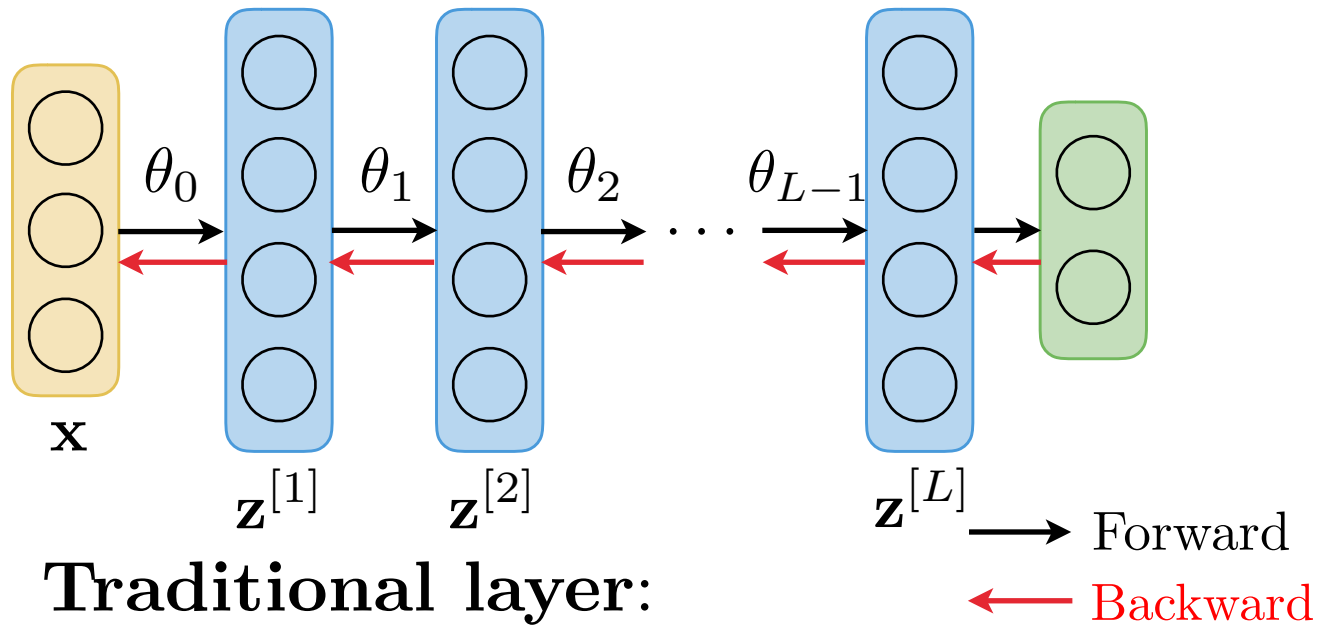

$$\mathbf{z}^{[i+1]} = f_{\theta_i}(\mathbf{z}^{[i]}) = \sigma(W_i \mathbf{z}^{[i]} + b_i)$$

(just a simple example)

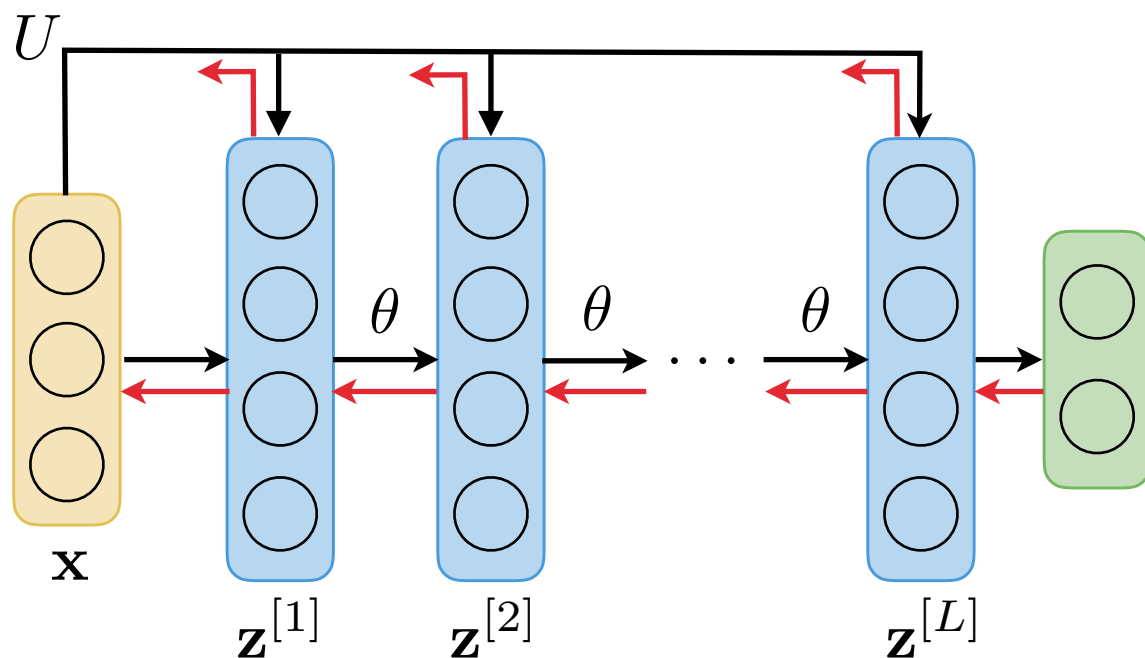

Weight-tied input-injected layer:

$$\mathbf{z}^{[i+1]} = f_{\theta}(\mathbf{z}^{[i]}; \mathbf{x}) = \sigma(W \mathbf{z}^{[i]} + U \mathbf{x} + b)$$

Isn't weight-tying a big restriction?

- **Theoretically, no:** We show that any deep feedforward network can be represented by a weight-tied, input-injected network of equivalent depth.

- **Empirically, no:** The (many) recent successes of weight-tied models: TrellisNet [Bai et al., ICLR 2019], Universal Transformer [Dehghani et al., ICLR 2019], ALBERT [Lan et al., preprint].

# Equilibrium Points, and the DEQ Model

We now can think of a deep network as *repeated* applications of some function

$$\mathbf{z}^{[i+1]} = f_{\theta}(\mathbf{z}^{[i]}; \mathbf{x})$$

In practice (a bit more on this point shortly), after these types of models converge to an **equilibrium point** (i.e., an "infinite depth" network)

$$\mathbf{z}^* = f_{\theta}(\mathbf{z}^*; \mathbf{x})$$

**Deep Equilibrium (DEQ) Models:** Find this equilibrium point directly via root-finding (e.g., Newton/quasi-Newton methods) rather than iterating the forward model. Backpropagate via implicit differentiation.

# A Formal Summary of the DEQ Approach

Define a single layer  $f_\theta(\mathbf{z}; \mathbf{x})$ .

Virtually always exists in practice  
(examples later)

**Forward pass:** Given an input  $\mathbf{x}$ , compute the equilibrium point  $\mathbf{z}^*$ , such that

$$f_\theta(\mathbf{z}^*; \mathbf{x}) - \mathbf{z}^* = 0$$

(via any black-box root solver; e.g. Broyden's method)

**Backward pass:** Implicitly differentiate through the equilibrium state to form gradients:

$$\frac{\partial \ell}{\partial (\cdot)} = \frac{\partial \ell}{\partial \mathbf{z}^*} \left( I - \frac{\partial f_\theta}{\partial \mathbf{z}^*} \right)^{-1} \frac{\partial f_\theta}{\partial (\cdot)}$$

Jacobian at the  
equilibrium

Gradient of one layer

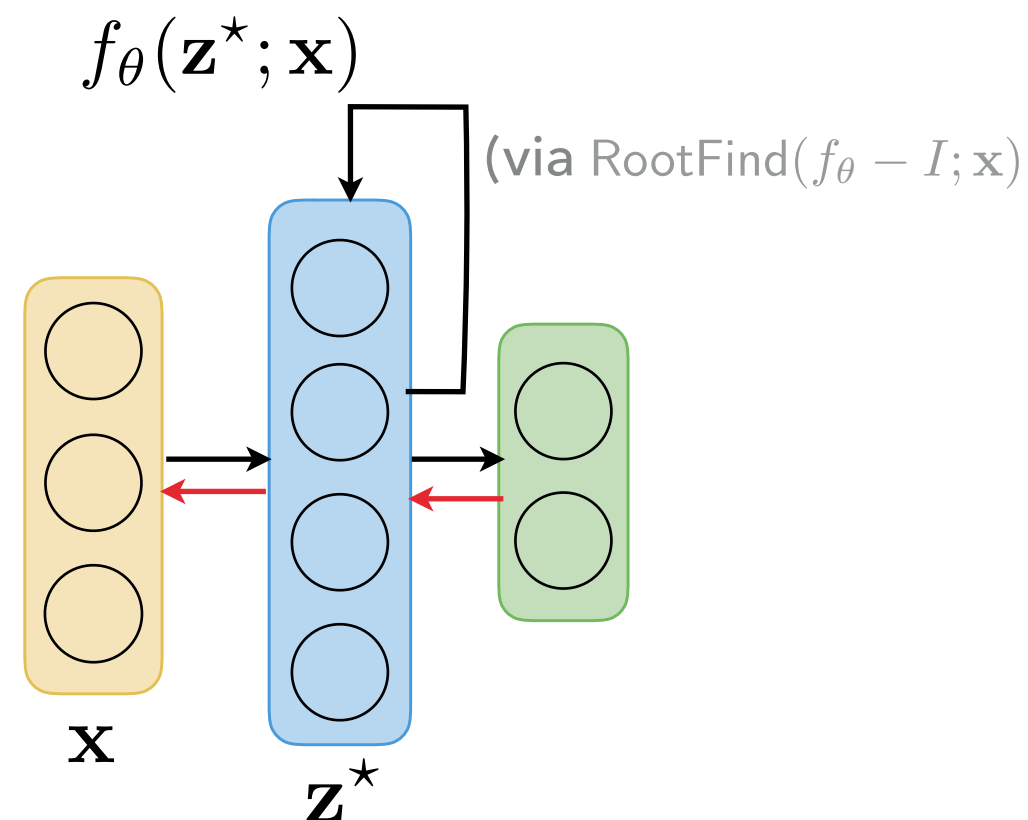

# FAQs

Q: Is DEQ related to the decade-old *attractor network*, and the *recurrent backprop* (RBP) ideas?

- **Yes!** Our main contributions here are **conceptual** and **empirical**: 1) We advocate for replacing general, modern, highly structured networks with single-layer equilibrium models, not using simple recurrent cells; and 2) We demonstrate that with these networks, the method can achieve SOTA performance with vast reduction in memory.

Q: Why not stack *these* deep equilibrium "implicit" layers (with potentially different functions)?

- **No!** Stacked DEQs can be equivalently represented as a single (wider) DEQ; i.e., "deep" DEQs doesn't give you more; it's only a matter of designing  $f_\theta$ .

Intuitively,  $\exists \Gamma_\Theta$  s.t.  $\text{DEQ}_{\Gamma_\Theta} = \text{DEQ}_{h_{\theta_2}} \circ \text{DEQ}_{f_{\theta_1}}$

# FAQs

Q: What are the relative time/memory tradeoffs?

- **Typically ~2-2.5x slower to train, ~1.5-2x slower for inference** (root finding takes slightly longer than iterating a small fixed # of forward steps).

**Forward pass:** black-box root solving  
(e.g., fast Quasi-Newton methods)

**Backward pass:** One-step multiplication  
with the inverse Jacobian at equilibrium

- **Constant memory consumption:** no need to store any intermediate value (i.e., no growth at all with "depth";  $O(1)$ ). Only need to store  $\mathbf{x}, \mathbf{z}^*, \theta$ .

# DEQs for Sequence Modeling

- One can easily extend the methods above to create DEQ versions of all common sequence modeling architectures.
- We specifically provide two *instantiations of DEQ* based on two very different SOTA sequence modeling architectures:

1) **DEQ-TrellisNet**: equilibrium version of TrellisNet architecture [Bai et al., ICLR 2019], a type of **weight-tied temporal convolutions** that generalizes RNNs

2) **DEQ-Transformer**: equilibrium version of Transformer architecture [Vaswani et al., NIPS 2017], with **weight-tied multi-head self-attention** [Dehghani et al., ICLR 2019]

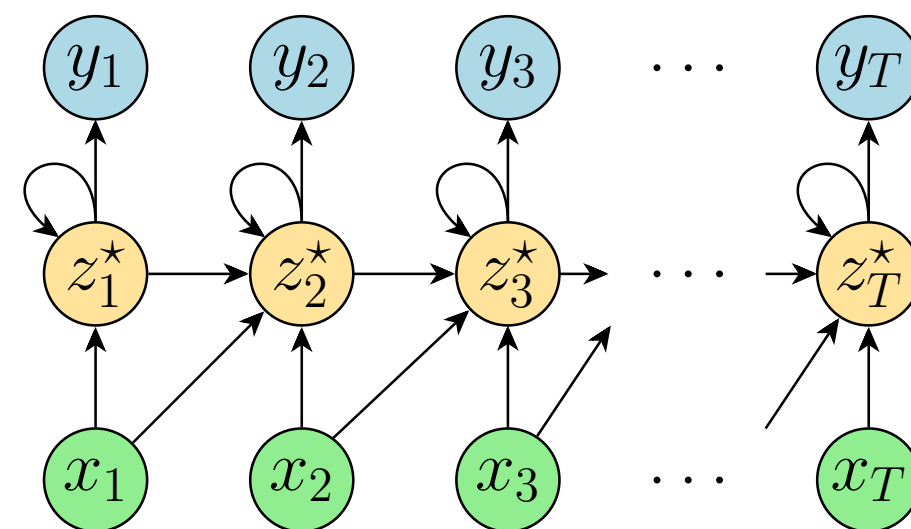

$$\begin{aligned} \mathbf{z}_{1:T}^* &= f_{\theta}(\mathbf{z}_{1:T}^*; \mathbf{x}_{1:T}) \\ &= \text{RootFind}(g_{\theta}; \mathbf{x}_{1:T}) \end{aligned}$$

More details in the paper.



# Large-Scale Benchmarks

## Word-level Language Modeling on WikiText-103 (WT103)

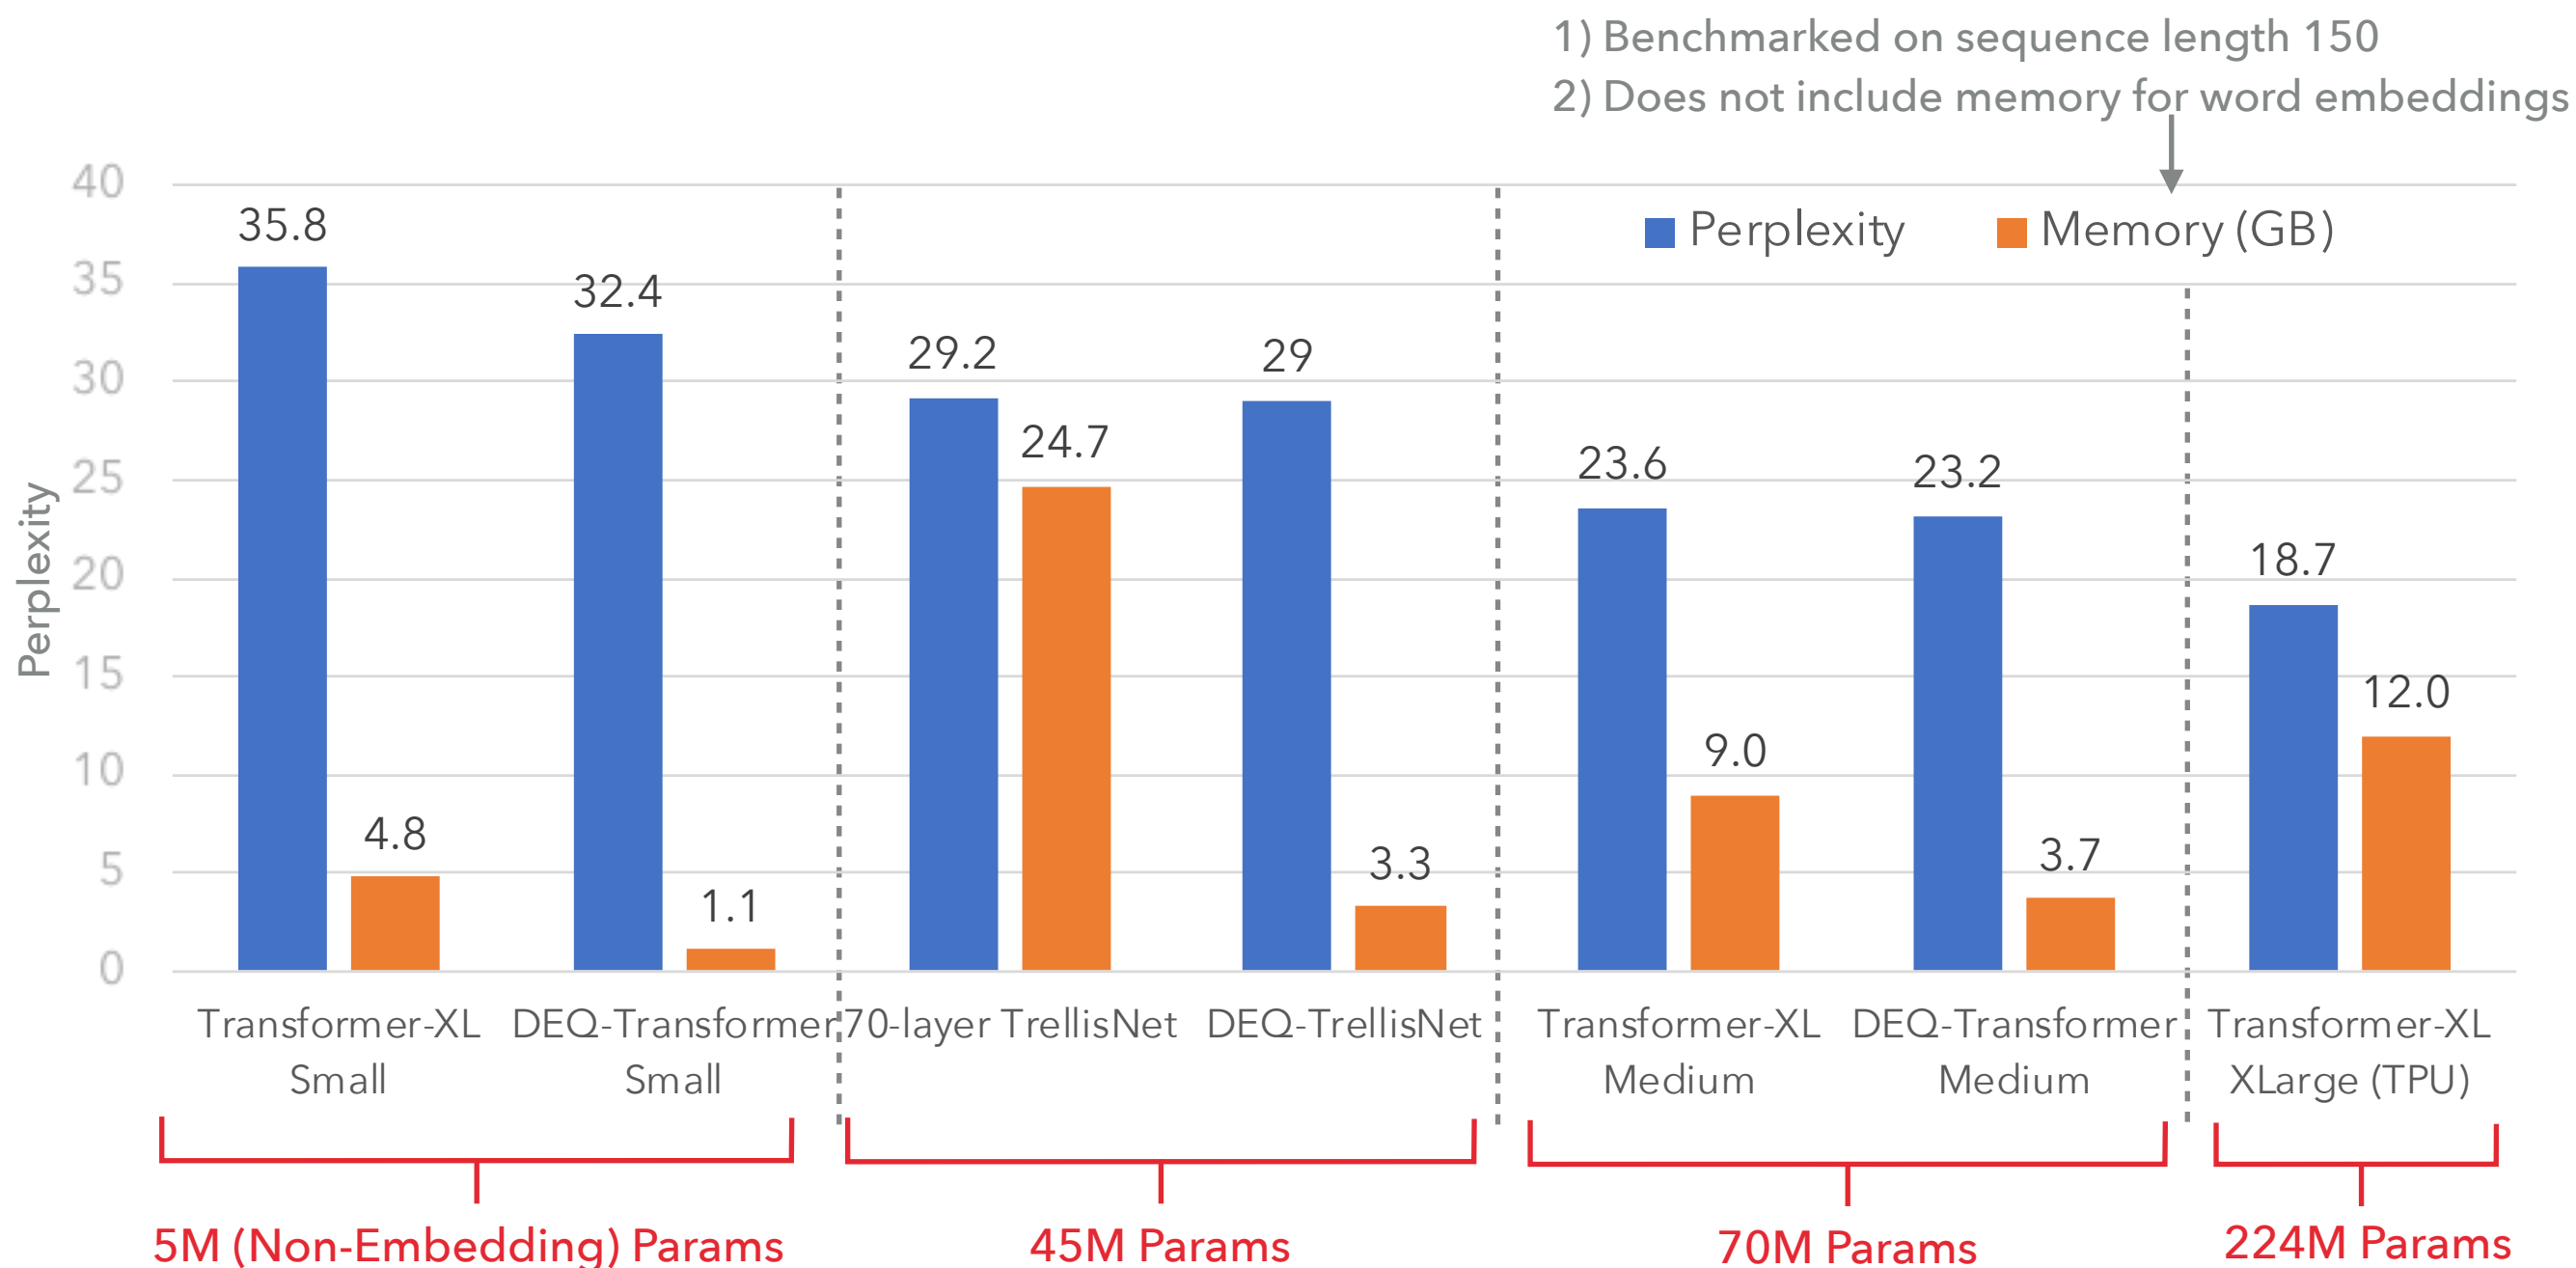

More results in the paper.

# Summary, Thoughts and Challenges

- DEQ represents the largest-scale practical application of implicit layers in deep learning of which we are aware.
- DEQ computes an "infinite-depth" network. DEQ's **forward pass** relies on a direct root solving; its **backward pass** relies only on the equilibrium point, not on any of the intermediate "hidden features". Memory needed to train DEQ is therefore constant (i.e., equivalent to that of 1 layer).
- DEQ performs competitively with SOTA architectures, but with up to 90% reduction in memory cost.
- How should we understand depth in deep networks?
- Let the objective of a model be implicitly defined (e.g., "the equilibrium")?

Interested in DEQ? Stop by our poster at  
Exhibition Hall B+C #137 (right after this talk) ;-)
